# Supplementary material
Source: PubMed Central journal article supplement (PMC7109869)
Supplement: Supplemental_mvx039.pdf [file Supplemental_mvx039.pdf]

*Supplemental Tables S1 and S2.*

**Table S1.** Composition of pre-incubation buffer.

| <b>Chemical name</b>               | <b>3x conc. solution<sup>a</sup></b> |
|------------------------------------|--------------------------------------|
| Tris-acetate (pH 8.2)              | 300 mM                               |
| Mg acetate                         | 9.3 mM                               |
| ATP adjusted pH 7.0 by KOH         | 13 mM                                |
| DTT                                | 4 mM                                 |
| 19 amino acids, without L-tyrosine | each 0.04 mM                         |
| L-tyrosine                         | 0.04 mM                              |
| phosphoenolpyruvate                | 84 mM                                |
| pyruvate kinase                    | 6.67 U/ml                            |

a. 30% volume of cell extract is added and incubated for 80 min at 37 °C.

**Table S2.** List of chemicals and concentration used in the cell-free protein synthesis presented in this paper by micro dialysis method (30- $\mu$ l inner solution dialyzed against 1 ml feeding solution).

| CAS No.    | Chemical name                                     | Concentration     | Reaction solution | Feeding solution |
|------------|---------------------------------------------------|-------------------|-------------------|------------------|
| 7365-45-9  | HEPES                                             | 59.25 mM          | +                 | +                |
| 19473-49-5 | L-Glutamic Acid<br>Pottasium Salt<br>Monohydrate  | 197.8 mM          | +                 | +                |
| 922-32-7   | Creatine Phosphate<br>Disodium salt               | 79.2 mM           | +                 | +                |
| 1492-18-8  | Folinic acid-Ca                                   | 35.5 mg/L         | +                 | +                |
| 987-65-5   | ATP- $\text{Na}_2 \cdot 3\text{H}_2\text{O}$      | 1.28 mM           | +                 | +                |
| 36051-31-7 | GTP- $\text{Na}_2 \cdot 3\text{H}_2\text{O}$      | 0.89 mM           | +                 | +                |
| 36051-68-0 | CTP- $\text{Na}_2 \cdot 3\text{H}_2\text{O}$      | 0.89 mM           | +                 | +                |
| 19817-92-6 | UTP- $\text{Na}_2 \cdot 3\text{H}_2\text{O}$      | 0.89 mM           | +                 | +                |
| 631-61-8   | Ammonium Acetate                                  | 27.4 mM           | +                 | +                |
| 3483-12-3  | DTT                                               | 1.85mM            | +                 | +                |
| 60-18-4    | L-Tyr                                             | 1.53 mM           | +                 | +                |
| 37839-81-9 | 3,5-cAMP-Na                                       | 0.66 mM           | +                 | +                |
| 16674-78-5 | Magnesium Acetate<br>Tetrahydrate                 | 9.28 mM           | +                 | +                |
|            | 19 amino acids mix<br>without L-Tyr <sup>*a</sup> | each 1.5 mM       | +                 | +                |
|            | $\text{NaN}_3$                                    | 0.050 %           | +                 | +                |
|            | tRNA ( <i>E. coli</i> )                           | 175 $\mu$ g /ml   | +                 | -                |
|            | Creatine Kinase                                   | 250 $\mu$ g/ml    | +                 | -                |
|            | T7 RNA polymerase                                 | 67 $\mu$ g /ml    | +                 | -                |
|            | Template DNA<br>(plasmid)                         | 2 $\mu$ g/ml      | +                 | -                |
|            | S30 extract                                       | 9 $\mu$ l (30%)   | +                 | -                |
|            | S30 buffer <sup>*b</sup>                          | 300 $\mu$ l (30%) | -                 | +                |

a. 19 amino acids mix contains 10 mM DTT (0.75 mM final concentration).

b. S30 buffer is composed of 10 mM Tris-acetate (pH 8.2), 14 mM magnesium acetate, 60 mM potassium acetate, and 1 mM DTT.
